# Supplementary material for: Analysis of Multiple Sarcoma Expression Datasets: Implications for Classification, Oncogenic Pathway Activation and Chemotherapy Resistance
Source: PLoS One. 2010 Apr 1;5(4):e9747. doi: 10.1371/journal.pone.0009747 (PMC2848563; doi:10.1371/journal.pone.0009747)
Supplement: Table S2 — Sensitivity and specificity of the 170-gene Nearest Centroid predictor for each STS class in the STANFORD and MSKCC validation datasets. (0.02 MB XLS) [file pone.0009747.s006.xls]

## Sheet: Sheet1
STANFORD DATASET
Class	Sensitivity	Specificity
Liposarcoma (4)	0.75	0.92
Leiomyosarcoma (11)	0.64	0.79
Synovial Sarcoma (8)	1	1
OVERALL ACCURACY	0.78
MSKCC DATASET
Class	Sensitivity	Specificity
Liposarcoma (11)	0.82	0.95
Fibrosarcoma (7)	0.71	0.95
Leiomyosarcoma (6)	1	0.95
Synovial Sarcoma (4)	1	0.96
OVERALL ACCURACY	0.86
