# Supplementary material for: Analysis of Multiple Sarcoma Expression Datasets: Implications for Classification, Oncogenic Pathway Activation and Chemotherapy Resistance
Source: PLoS One. 2010 Apr 1;5(4):e9747. doi: 10.1371/journal.pone.0009747 (PMC2848563; doi:10.1371/journal.pone.0009747)
Supplement: Table S6 — Gene expression pattern of the Ras activated samples was enriched for targets of microRNAs of the let-7 family. (0.02 MB XLS) [file pone.0009747.s010.xls]

## Sheet: Sheet1
JAPAN		#genes	LS	KS	Goeman
	hsa-let-7b_MIMAT0000063	230	1e-05	1e-05	1.1e-06
	hsa-let-7c_MIMAT0000064	240	1e-05	1e-05	5.3e-06
	hsa-let-7d_MIMAT0000065	251	1e-05	1e-05	7.3e-06
	hsa-let-7e_MIMAT0000066	224	1e-05	1e-05	2.2e-06
	hsa-let-7g_MIMAT0000414	261	1e-05	1e-05	2e-06
	hsa-let-7i_MIMAT0000415	260	1e-05	1e-05	6.7e-06
MSCCC
	hsa-let-7a_MIMAT0000062	285	1e-05	1e-05	0.078581
	hsa-let-7b_MIMAT0000063	257	1e-05	1e-05	0.022564
	hsa-let-7c_MIMAT0000064	271	1e-05	1e-05	0.044606
	hsa-let-7d_MIMAT0000065	278	1e-05	1e-05	0.031763
	hsa-let-7e_MIMAT0000066	244	1e-05	1e-05	0.017979
	hsa-let-7f_MIMAT0000067	276	1e-05	1e-05	0.049819
	hsa-let-7g_MIMAT0000414	276	1e-05	1e-05	0.029653
	hsa-let-7i_MIMAT0000415	293	1e-05	1e-05	0.028686
UK
	hsa-let-7a_MIMAT0000062	288	1e-05	1e-05	0.000339
	hsa-let-7b_MIMAT0000063	244	1e-05	1e-05	0.00011
	hsa-let-7c_MIMAT0000064	268	1e-05	1e-05	0.000273
	hsa-let-7d_MIMAT0000065	264	1e-05	1e-05	0.00052
	hsa-let-7e_MIMAT0000066	241	1e-05	1e-05	0.000466
	hsa-let-7f_MIMAT0000067	274	1e-05	1e-05	0.000239
	hsa-let-7g_MIMAT0000414	299	1e-05	1e-05	0.000378
	hsa-let-7i_MIMAT0000415	284	1e-05	1e-05	0.000937
