# Supplementary material for: Analysis of Multiple Sarcoma Expression Datasets: Implications for Classification, Oncogenic Pathway Activation and Chemotherapy Resistance
Source: PLoS One. 2010 Apr 1;5(4):e9747. doi: 10.1371/journal.pone.0009747 (PMC2848563; doi:10.1371/journal.pone.0009747)
Supplement: Table S7 — Detailed clustering results of the classified MFH samples. (0.02 MB XLS) [file pone.0009747.s011.xls]

## Sheet: Sheet1
MFH PREDICTIONS	COCLUSTERED	MISCLUSTERED
MFH-LEIO (11)	10	1
MFH-LIPO (35)	28	7
MFH-SYN (8)	4	4
MFH-FIBRO (22)	16	6
TOTAL (76)	58	18
